# Supplementary material for: Association of maternal circulating 25(OH)D and calcium with birth weight: A mendelian randomisation analysis
Source: PubMed Central journal article supplement (PMC6581250; doi:10.1371/journal.pmed.1002828), 2019-06-18
Supplement: pmed.1002828.s007.pdf [file pmed.1002828.s007.pdf]

**S1 Table: Characteristics of the genome-wide association studies of 25(OH)D**

| Study                    | Trait   | Population | No of Discovery cohorts | No of Discovery participants | No of Recovery cohorts | No of Recovery participants | N (total) | N(%) of participants that were female |
|--------------------------|---------|------------|-------------------------|------------------------------|------------------------|-----------------------------|-----------|---------------------------------------|
| Manousaki et al 2017[1]  | 25[OH]D | European   | 2                       | 2,619                        | 17                     | 39,655                      | 42,274    | 39.5                                  |
| Jiang et al 2018[2]      | 25[OH]D | European   | 31                      | 79,366                       | 2                      | 42,757                      | 122,123   | NA                                    |
| O'Seaghdha et al 2013[3] | Calcium | European   | 19                      | 39,400                       | 11                     | 21,875                      | 61,275    | 0                                     |

NA: data on proportion of males and females not provided

### **References**

1. Manousaki D, Dudding T, Haworth S, Hsu Y-H, Liu C-T, Medina-Gómez C, et al. Low-Frequency Synonymous Coding Variation in CYP2R1 Has Large Effects on Vitamin D Levels and Risk of Multiple Sclerosis. *The American Journal of Human Genetics*. 2017;101(2):227-38. doi: <https://doi.org/10.1016/j.ajhg.2017.06.014>.
2. Jiang X, O'Reilly PF, Aschard H, Hsu YH, Richards JB, Dupuis J, et al. Genome-wide association study in 79,366 European-ancestry individuals informs the genetic architecture of 25-hydroxyvitamin D levels. *Nature communications*. 2018;9(1):260. Epub 2018/01/19. doi: 10.1038/s41467-017-02662-2.
3. O'Seaghdha CM, Wu H, Yang Q, Kapur K, Guessous I, Zuber AM, et al. Meta-Analysis of Genome-Wide Association Studies Identifies Six New Loci for Serum Calcium Concentrations. *PLOS Genetics*. 2013;9(9):e1003796. doi: 10.1371/journal.pgen.1003796.
