# Supplementary material for: Association of maternal circulating 25(OH)D and calcium with birth weight: A mendelian randomisation analysis
Source: PubMed Central journal article supplement (PMC6581250; doi:10.1371/journal.pmed.1002828), 2019-06-18
Supplement: pmed.1002828.s008.pdf [file pmed.1002828.s008.pdf]

**S2 Table: Details of SNPs used in our Mendelian Randomisation analyses**

| Trait                  | SNP         | Nearest/Nearby gene | Trait raising allele | Trait lowering allele | Trait raising allele frequency (GWAS reported) | Difference in mean 25(OH)D or calcium (95% CI) per allele | Units of change in 25(OH)D or calcium per allele and GWAS used to obtain these results |
|------------------------|-------------|---------------------|----------------------|-----------------------|------------------------------------------------|-----------------------------------------------------------|----------------------------------------------------------------------------------------|
| Vitamin D (synthesis)  | rs10741657  | <i>CYP2R1</i>       | A                    | G                     | 0.4                                            | 0.031 (0.027 to 0.035)                                    | Log nmol/l (Jiang et al (2018) Nature Communications)[1]                               |
| Vitamin D (synthesis)  | rs117913124 | <i>CYP2R1</i>       | G                    | A                     | 0.975                                          | 0.21 (0.19 to 0.23)*                                      | Log nmol/l (Manousaki et al (2017) The American Journal of Human Genetics) [2]         |
| Vitamin D (synthesis)  | rs12785878  | <i>DHCR7</i>        | T                    | G                     | 0.75                                           | 0.036 (0.032 to 0.04)                                     | Log nmol/l (Jiang et al (2018) Nature Communications)[1]                               |
| Vitamin D (metabolism) | rs3755967   | <i>GC</i>           | C                    | T                     | 0.72                                           | 0.089 (0.084 to 0.094)                                    | Log nmol/l (Jiang et al (2018) Nature Communications)[1]                               |
| Vitamin D (metabolism) | rs17216707  | <i>CYP24A1</i>      | T                    | C                     | 0.79                                           | 0.026 (0.021 to 0.031)                                    | Log nmol/l (Jiang et al (2018) Nature Communications)[1]                               |
| Vitamin D              | rs10745742  | <i>AMDHD1</i>       | T                    | C                     | 0.41                                           | 0.017 (0.013 to 0.021)                                    | Log nmol/l (Jiang et al (2018) Nature Communications)[1]                               |

|           |            |                                 |   |   |      |                        |                                                          |
|-----------|------------|---------------------------------|---|---|------|------------------------|----------------------------------------------------------|
| Vitamin D | rs8018720  | <i>SEC23A</i>                   | G | C | 0.27 | 0.017 (0.012 to 0.022) | Log nmol/l (Jiang et al (2018) Nature Communications)[1] |
| Calcium   | rs1801725  | <i>CASR</i>                     | T | G | 0.15 | 0.071 (0.063 to 0.079) | Mg/dl (O'Seaghdha et al (2013) PLOS Genetics)[3]         |
| Calcium   | rs1550532  | <i>DGKD</i>                     | C | G | 0.31 | 0.018 (0.012 to 0.024) | Mg/dl (O'Seaghdha et al (2013) PLOS Genetics)[3]         |
| Calcium   | rs780094   | <i>GCKR</i>                     | T | C | 0.41 | 0.017 (0.011 to 0.023) | Mg/dl (O'Seaghdha et al (2013) PLOS Genetics)[3]         |
| Calcium   | rs10491003 | <i>GATA3</i>                    | T | C | 0.09 | 0.027 (0.017 to 0.037) | Mg/dl (O'Seaghdha et al (2013) PLOS Genetics)[3]         |
| Calcium   | rs7481584  | <i>CARS</i>                     | G | A | 0.71 | 0.018 (0.012 to 0.024) | Mg/dl (O'Seaghdha et al (2013) PLOS Genetics)[3]         |
| Calcium   | rs7336933  | <i>DGKH;</i><br><i>KIAA0564</i> | G | A | 0.85 | 0.022 (0.014 to 0.03)  | Mg/dl (O'Seaghdha et al (2013) PLOS Genetics)[3]         |
| Calcium   | rs1570669  | <i>CYP24A1</i>                  | G | A | 0.33 | 0.018 (0.012 to 0.024) | Mg/dl (O'Seaghdha et al (2013) PLOS Genetics)[3]         |

\*The reported value in Manousaki et al[2] was 0.43 (0.39 to 0.47) standard deviations of 25(OH)D in log nmol/L, to get the value in log nmol/L we multiplied by 0.487, the standard deviation for 25(OH)D levels in ALSPAC in log nmol/L.

## **References**

1. Jiang X, O'Reilly PF, Aschard H, Hsu YH, Richards JB, Dupuis J, et al. Genome-wide association study in 79,366 European-ancestry individuals informs the genetic architecture of 25-hydroxyvitamin D levels. *Nature communications*. 2018;9(1):260. Epub 2018/01/19. doi: 10.1038/s41467-017-02662-2.
2. Manousaki D, Dudding T, Haworth S, Hsu Y-H, Liu C-T, Medina-Gómez C, et al. Low-Frequency Synonymous Coding Variation in CYP2R1 Has Large Effects on Vitamin D Levels and Risk of Multiple Sclerosis. *The American Journal of Human Genetics*. 2017;101(2):227-38. doi: <https://doi.org/10.1016/j.ajhg.2017.06.014>.
3. O'Seaghda CM, Wu H, Yang Q, Kapur K, Guessous I, Zuber AM, et al. Meta-Analysis of Genome-Wide Association Studies Identifies Six New Loci for Serum Calcium Concentrations. *PLOS Genetics*. 2013;9(9):e1003796. doi: 10.1371/journal.pgen.1003796.
