# Supplementary material for: Association of maternal circulating 25(OH)D and calcium with birth weight: A mendelian randomisation analysis
Source: PubMed Central journal article supplement (PMC6581250; doi:10.1371/journal.pmed.1002828), 2019-06-18
Supplement: pmed.1002828.s010.pdf [file pmed.1002828.s010.pdf]

**S4 Table: Studies used to calculate the RCT instrumental variable effect of calcium on birth weight**

| <u>Studies</u>                    | <u>Number of participants in the study</u> | <u>Mean Difference in birth weight between supplementation and placebo group, in g</u> | <u>Mean Difference in calcium levels between supplementation and placebo group, in mg/dl</u> |
|-----------------------------------|--------------------------------------------|----------------------------------------------------------------------------------------|----------------------------------------------------------------------------------------------|
| Bogges (1997)[1]                  | 18                                         | 82 (-97.3 to 261.3)                                                                    | 0.1 (-6.262 to 6.462)                                                                        |
| Chan (2006)[2]                    | 41                                         | 15 (-89.87 to 119.87)                                                                  | 0.1 (-0.51 to 0.71)                                                                          |
| Lopez-Jaramillo (1989)[3]         | 92                                         | 265 (142.5 to 287.5)                                                                   | 0.16 (-0.12 to 0.44)                                                                         |
| Lopez-Jaramillo (1997)[4]         | 260                                        | 110 (73.44 to 146.56)                                                                  | 0.28 (0.28 to 0.28)                                                                          |
| Belizan (1983) (1g supplement)[5] | 16                                         | -354.000 (-751.35 to 43.35)                                                            | 0.42 (-1.97 to 2.81)                                                                         |
| Belizan (1983) (2g supplement)[5] | 16                                         | 42.000 (-268.82 to 352.82)                                                             | 0.94 (-2.14 to 4.02)                                                                         |
| Wanchu 2001[6]                    | 100                                        | 100.000 (-77.48 to 277.48)                                                             | 0.3 (-0.39 to 0.99)                                                                          |

The RCTs used in the analyses of the effect of gestational circulating 25(OH)D on birth weight were identified from the systematic review by Buppasiri et al 2015[7]

### **References**

1. Bogges KA, Samuel L, Schmucker BC, Waters J, Easterling TR. A randomized controlled trial of the effect of third-trimester calcium supplementation on maternal hemodynamic function. *Obstet Gynecol.* 1997;90(2):157-61. Epub 1997/08/01. doi: 10.1016/s0029-7844(97)00248-2.
2. Chan GM, McElligott K, McNaught T, Gill G. Effects of dietary calcium intervention on adolescent mothers and newborns: A randomized controlled trial. *Obstet Gynecol.* 2006;108(3 Pt 1):565-71. Epub 2006/09/02. doi: 10.1097/01.AOG.0000231721.42823.9e.
3. P. LJ, M. N, M. WR, R. Y. Calcium supplementation reduces the risk of pregnancy-induced hypertension in an Andes population. *BJOG: An International Journal of Obstetrics & Gynaecology.* 1989;96(6):648-55. doi: doi:10.1111/j.1471-0528.1989.tb03278.x.
4. Lopez-Jaramillo P, Delgado F, Jacome P, Teran E, Ruano C, Rivera J. Calcium supplementation and the risk of preeclampsia in Ecuadorian pregnant teenagers. *Obstet Gynecol.* 1997;90(2):162-7. Epub 1997/08/01. doi: 10.1016/s0029-7844(97)00254-8.

5. Belizan JM, Villar J, Zalazar A, Rojas L, Chan D, Bryce GF. Preliminary evidence of the effect of calcium supplementation on blood pressure in normal pregnant women. *American journal of obstetrics and gynecology*. 1983;146(2):175-80. Epub 1983/05/15.
6. Wanchu M, Malhotra S, Khullar M. Calcium supplementation in pre-eclampsia. *The Journal of the Association of Physicians of India*. 2001;49:795-8. Epub 2002/02/12.
7. Buppasiri P, Lumbiganon P, Thinkhamrop J, Ngamjarus C, Laopaiboon M, Medley N. Calcium supplementation (other than for preventing or treating hypertension) for improving pregnancy and infant outcomes. *Cochrane Database of Systematic Reviews*. 2015;(2). doi: 10.1002/14651858.CD007079.pub3.
