# Supplementary material for: Association of maternal circulating 25(OH)D and calcium with birth weight: A mendelian randomisation analysis
Source: PubMed Central journal article supplement (PMC6581250; doi:10.1371/journal.pmed.1002828), 2019-06-18
Supplement: pmed.1002828.s011.pdf [file pmed.1002828.s011.pdf]

**S5 Table:SNP effects on first child birth weight in all studies**

| SNP         | Study                  | SNP-outcome effect (g)      |
|-------------|------------------------|-----------------------------|
| rs10741657  | UK Biobank (N=190,406) | 1.517 (-1.567 to 4.601)     |
|             | ALSPAC (N=4,576)       | 12.076 (-6.313 to 30.464)   |
|             | EFSOCH (N=647)         | -7.120 (-54.209 to 39.968)  |
| rs117913124 | UK Biobank (N=190,406) | -1.121 (-10.34 to 8.097)    |
|             | ALSPAC (N=4,576)       | 0.244 (-55.124 to 55.613)   |
|             | EFSOCH (N=647)         | 19.734 (-123.241 to 162.71) |
| rs12785878  | UK Biobank (N=190,406) | 2.030 (-1.682 to 5.742)     |
|             | ALSPAC (N=4,576)       | 15.855 (-5.217 to 36.927)   |
|             | EFSOCH (N=647)         | -0.542 (-57.256 to 56.173)  |
| rs3755967   | UK Biobank (N=190,406) | -0.756 (-4.09 to 2.578)     |
|             | ALSPAC (N=4,576)       | 9.447 (-10.41 to 29.303)    |
|             | EFSOCH (N=647)         | 34.727 (-17.749 to 87.202)  |
| rs17216707  | UK Biobank (N=190,406) | 1.943 (-2.001 to 5.888)     |
|             | ALSPAC (N=4,576)       | 0.926 (-22.32 to 24.173)    |
|             | EFSOCH (N=647)         | 2.150 (-63.878 to 68.177)   |
| rs10745742  | UK Biobank (N=190,406) | -1.813 (-4.951 to 1.324)    |
|             | ALSPAC (N=4,576)       | -1.352 (-20.246 to 17.543)  |
|             | EFSOCH (N=647)         | -34.556 (-82.902 to 13.789) |
| rs8018720   | UK Biobank (N=190,406) | -1.862 (-5.835 to 2.111)    |
|             | ALSPAC (N=4,576)       | 6.977 (-16.75 to 30.704)    |
|             | EFSOCH (N=647)         | 13.136 (-50.613 to 76.885)  |
| rs1801725   | UK Biobank (N=190,406) | 1.349 (-3.166 to 5.865)     |
|             | ALSPAC (N=4,576)       | 31.759 (4.884 to 58.634)    |
|             | EFSOCH (N=647)         | -18.180 (-87.642 to 51.282) |
| rs1550532   | UK Biobank (N=190,406) | -2.579 (-5.832 to 0.674)    |
|             | ALSPAC (N=4,576)       | -6.095 (-25.7 to 13.511)    |
|             | EFSOCH (N=647)         | -1.471 (-53.177 to 50.236)  |
| rs780094    | UK Biobank (N=190,406) | -5.379 (-8.495 to -2.263)   |

|            |                        |                              |
|------------|------------------------|------------------------------|
|            | ALSPAC (N=4,576)       | -1.747 (-20.415 to 16.921)   |
|            | EFSOCH (N=647)         | -24.770 (-70.675 to 21.135)  |
| rs10491003 | UK Biobank (N=190,406) | 1.169 (-4.065 to 6.403)      |
|            | ALSPAC (N=4,576)       | -0.579 (-32.680 to 31.521)   |
|            | EFSOCH (N=647)         | -19.229 (-100.591 to 62.133) |
| rs7481584  | UK Biobank (N=190,406) | -2.195 (-5.553 to 1.164)     |
|            | ALSPAC (N=4,576)       | -4.468 (-24.868 to 15.932)   |
|            | EFSOCH (N=647)         | -1.612 (-56.211 to 52.987)   |
| rs7336933  | UK Biobank (N=190,406) | -3.252 (-7.474 to 0.97)      |
|            | ALSPAC (N=4,576)       | 6.193 (-19.201 to 31.586)    |
|            | EFSOCH (N=647)         | -42.09 (-108.322 to 24.142)  |
| rs1570669  | UK Biobank (N=190,406) | -0.573 (-3.781 to 2.636)     |
|            | ALSPAC (N=4,576)       | -9.767 (-28.881 to 9.347)    |
|            | EFSOCH (N=647)         | 21.217 (-28.934 to 71.367)   |
