# Supplementary material for: Association of maternal circulating 25(OH)D and calcium with birth weight: A mendelian randomisation analysis
Source: PubMed Central journal article supplement (PMC6581250; doi:10.1371/journal.pmed.1002828), 2019-06-18
Supplement: pmed.1002828.s012.pdf [file pmed.1002828.s012.pdf]

**S6 Table: SNP effects on own birth weight in UK Biobank (N=215,444)**

| SNP         | SNP-outcome effect (g)     |
|-------------|----------------------------|
| rs10741657  | 4.083 (1.178 to 6.987)     |
| rs117913124 | -3.97 (-12.703 to 4.763)   |
| rs12785878  | 3.349 (-0.134 to 6.831)    |
| rs3755967   | 0.652 (-2.487 to 3.792)    |
| rs17216707  | 4.041 (0.339 to 7.742)     |
| rs10745742  | -0.533 (-3.479 to 2.412)   |
| rs8018720   | -1.492 (-5.232 to 2.249)   |
| rs1801725   | -6.466 (-10.715 to -2.217) |
| rs1550532   | -5.091 (-8.151 to -2.03)   |
| rs780094    | -1.948 (-4.878 to 0.983)   |
| rs10491003  | 2.010 (-2.932 to 6.951)    |
| rs7481584   | 1.236 (-1.923 to 4.396)    |
| rs7336933   | 0.208 (-3.769 to 4.186)    |
| rs1570669   | 3.407 (0.392 to 6.423)     |
