# Supplementary material for: Association of maternal circulating 25(OH)D and calcium with birth weight: A mendelian randomisation analysis
Source: PubMed Central journal article supplement (PMC6581250; doi:10.1371/journal.pmed.1002828), 2019-06-18
Supplement: pmed.1002828.s013.pdf [file pmed.1002828.s013.pdf]

**S7 Table: SNP effects on fetal adjusted birth weight in ALSPAC and EFSOCH**

| SNP         | Study            | SNP-outcome effect (g)       |
|-------------|------------------|------------------------------|
| rs10741657  | ALSPAC (N=4,576) | 12.325 (-8.705 to 33.355)    |
|             | EFSOCH (N=647)   | -21.514 (-76.659 to 33.631)  |
| rs117913124 | ALSPAC (N=4,576) | 9.165 (-56.077 to 74.407)    |
|             | EFSOCH (N=647)   | 11.226 (-147.894 to 170.345) |
| rs12785878  | ALSPAC (N=4,576) | 27.337 (3.041 to 51.633)     |
|             | EFSOCH (N=647)   | -15.656 (-80.016 to 48.704)  |
| rs3755967   | ALSPAC (N=4,576) | 13.299 (-9.578 to 36.176)    |
|             | EFSOCH (N=647)   | 42.838 (-18.736 to 104.412)  |
| rs17216707  | ALSPAC (N=4,576) | -0.508 (-27.622 to 26.607)   |
|             | EFSOCH (N=647)   | -12.660 (-87.102 to 61.782)  |
| rs10745742  | ALSPAC (N=4,576) | -3.128 (-24.790 to 18.533)   |
|             | EFSOCH (N=647)   | -59.398 (-116.456 to -2.34)  |
| rs8018720   | ALSPAC (N=4,576) | -3.236 (-30.492 to 24.019)   |
|             | EFSOCH (N=647)   | 20.294 (-53.447 to 94.034)   |
| rs1801725   | ALSPAC (N=4,576) | 31.476 (0.706 to 62.246)     |
|             | EFSOCH (N=647)   | -43.012 (-120.582 to 34.558) |
| rs1550532   | ALSPAC (N=4,576) | 5.037 (-17.553 to 27.627)    |
|             | EFSOCH (N=647)   | -16.937 (-77.309 to 43.435)  |
| rs780094    | ALSPAC (N=4,576) | 8.070 (-13.375 to 29.515)    |
|             | EFSOCH (N=647)   | -31.69 (-85.520 to 22.139)   |
| rs10491003  | ALSPAC (N=4,576) | -6.140 (-42.415 to 30.134)   |
|             | EFSOCH (N=647)   | -48.253 (-139.743 to 43.236) |
| rs7481584   | ALSPAC (N=4,576) | -2.332 (-25.799 to 21.135)   |
|             | EFSOCH (N=647)   | -4.990 (-67.296 to 57.317)   |
| rs7336933   | ALSPAC (N=4,576) | 2.363 (-26.832 to 31.558)    |
|             | EFSOCH (N=647)   | -17.501 (-94.267 to 59.265)  |
| rs1570669   | ALSPAC (N=4,576) | -17.949 (-39.990 to 4.092)   |
|             | EFSOCH (N=647)   | 10.717 (-47.005 to 68.439)   |
