# Supplementary material for: Association of maternal circulating 25(OH)D and calcium with birth weight: A mendelian randomisation analysis
Source: PubMed Central journal article supplement (PMC6581250; doi:10.1371/journal.pmed.1002828), 2019-06-18
Supplement: pmed.1002828.s014.pdf [file pmed.1002828.s014.pdf]

|                                    |                       |                 |     |         |         |         |      |         |         |         |     |
|------------------------------------|-----------------------|-----------------|-----|---------|---------|---------|------|---------|---------|---------|-----|
| Khan (2016)[10]                    | 85                    | Unclear         | Yes | Unclear | Unclear | Low     | Low  | Low     | Unclear | Low     | Low |
| Litonjua (2016)[11]                | 881                   | 8               | No  | No      | Low     | Unclear | Low  | Low     | Low     | Low     | Low |
| Mallet (L) (1986)[12] <sup>c</sup> | Unclear (36 analysed) | Unclear         | Yes | Unclear | Low     | Unclear | High | Low     | Low     | Low     | Low |
| Mallet (H) (1986)[12] <sup>c</sup> | Unclear (30 analysed) | Unclear         | Yes | Unclear | Low     | Unclear | High | Low     | Low     | Low     | Low |
| Mojibian (2015)[13]                | 500                   | 22              | No  | No      | Low     | Low     | High | High    | High    | Low     | Low |
| Mutlu (L) 2014[14]                 | 59                    | 24              | No  | No      | Unclear | Unclear | High | High    | Low     | Low     | Low |
| Mutlu (H) (2014)[14]               | 60                    | 27              | No  | No      | Unclear | Unclear | High | High    | Low     | Low     | Low |
| Roth (2013)[15]                    | 160                   | 8               | Yes | No      | Low     | Low     | Low  | Low     | Low     | Low     | Low |
| Sabet (2012)[16]                   | 50 analysed           | Unclear         | Yes | Unclear | Unclear | Unclear | Low  | Low     | Low     | Low     | Low |
| Sablok (2015)[17]                  | 180                   | 8               | No  | No      | Low     | Unclear | High | Unclear | Unclear | High    | Low |
| Sahoo (L) (2016)[18]               | 200                   | 85 <sup>d</sup> | Yes | No      | Low     | Low     | Low  | Low     | High    | Low     | Low |
| Sahoo (H) (2016)[18]               | 200                   | 80 <sup>d</sup> | No  | No      | Low     | Low     | Low  | Low     | High    | Low     | Low |
| Thiele (2016)[19]                  | 16                    | 19              | Yes | Yes     | Unclear | Unclear | Low  | Low     | Unclear | Unclear | Low |
| Yap (2014)[20]                     | 169                   | 6               | No  | No      | High    | High    | Low  | Low     | Low     | High    | Low |
| Valizadeh (2016)[21]               | 96                    | 6               | No  | Unclear | Unclear | Low     | High | High    | Low     | Low     | Low |
| Vaziri (2016)[22]                  | 153                   | 17%             | No  | No      | Unclear | Unclear | Low  | Low     | Low     | High    | Low |

|                        |     |    |     |         |     |      |      |      |     |     |     |
|------------------------|-----|----|-----|---------|-----|------|------|------|-----|-----|-----|
| Yu (L)<br>(2009)[23]   | 120 | 1  | No  | Unclear | Low | High | High | High | Low | Low | Low |
| Yu (H)<br>2009[23]     | 120 | 1  | No  | Unclear | Low | High | High | High | Low | Low | Low |
| Zerofsky<br>(2014)[24] | 57  | 14 | Yes | No      | Low | Low  | Low  | Low  | Low | Low | Low |

Note there are 30 rows in this table which reflects the 30 instrumental variable estimates from the 24 RCTs that were included in these analyses; two IV estimates were obtained from six trials in which participants were randomised to one of three groups: low dose vitamin D (L), high dose vitamin D (H) or control

<sup>a</sup> All entries relate to analyses of birth weight (birth weight is often not the primary outcome in these trials and the results may be different for the primary outcomes)

<sup>b</sup> Each of the seven categories were categorised by reviewers as low, medium, or high risk of bias or unclear. RSG: Random Sequence Generation; AC: Allocation Concealment; BP: Blinding of personnel/participants (performance bias); BO: Blinding of outcome assessment (detection bias); IOD: Incomplete outcome data (attrition bias); SR: Selective Reporting; Other: other sources of bias.

<sup>c</sup> For this study we were only able to access the abstracts and not the full papers

<sup>d</sup> This study was primarily concerned with outcomes at 12-16 months and over 80% were lost to follow-up by this age (47% had been lost to follow-up at birth but differences in BW between randomised groups was only presented in those included in the 12-16 months follow-up).

## **References**

1. Abotorabi S, Hashemi Poor S, Esmailzadehha N, Ziaee A, Khoeiniha MH. Effect of Treatment with Vitamin D on Maternal and Neonatal Indices in Pregnant Women with Hypocalcemia: A Randomized Controlled Trial. *International Journal of Pediatrics*. 2017;5(9):5733-9. doi: 10.22038/ijp.2017.22146.1851.
2. Asemi Z, Hashemi T, Karamali M, Samimi M, Esmailzadeh A. Effects of vitamin D supplementation on glucose metabolism, lipid concentrations, inflammation, and oxidative stress in gestational diabetes: a double-blind randomized controlled clinical trial. *The American Journal of Clinical Nutrition*. 2013;98(6):1425-32. doi: 10.3945/ajcn.113.072785.
3. Brooke OG, Brown IR, Bone CD, Carter ND, Cleeve HJ, Maxwell JD, et al. Vitamin D supplements in pregnant Asian women: effects on calcium status and fetal growth. *British Medical Journal*. 1980;280(6216):751-4.

4. Cooper C, Harvey NC, Bishop NJ, Kennedy S, Papageorgiou AT, Schoenmakers I, et al. Maternal gestational vitamin D supplementation and offspring bone health (MAVIDOS): a multicentre, double-blind, randomised placebo-controlled trial. *The Lancet Diabetes & Endocrinology*. 2016;4(5):393-402. doi: 10.1016/S2213-8587(16)00044-9.
5. Dawodu A, Saadi HF, Bekdache G, Javed Y, Altaye M, Hollis BW. Randomized controlled trial (RCT) of vitamin D supplementation in pregnancy in a population with endemic vitamin D deficiency. *The Journal of clinical endocrinology and metabolism*. 2013;98(6):2337-46. Epub 2013/04/06. doi: 10.1210/jc.2013-1154.
6. Grant CC, Stewart AW, Scragg R, Milne T, Rowden J, Ekeroma A, et al. Vitamin D during pregnancy and infancy and infant serum 25-hydroxyvitamin D concentration. *Pediatrics*. 2014;133(1):e143-53. Epub 2013/12/18. doi: 10.1542/peds.2013-2602.
7. Hashemipour S, Lalooha F, Zahir Mirdamadi S, Ziaee A, Dabaghi Ghaleh T. Effect of vitamin D administration in vitamin D-deficient pregnant women on maternal and neonatal serum calcium and vitamin D concentrations: a randomised clinical trial. *The British journal of nutrition*. 2013;110(9):1611-6. Epub 2013/05/01. doi: 10.1017/s0007114513001244.
8. Hollis BW, Johnson D, Hulsey TC, Ebeling M, Wagner CL. Vitamin D supplementation during pregnancy: double-blind, randomized clinical trial of safety and effectiveness. *Journal of bone and mineral research : the official journal of the American Society for Bone and Mineral Research*. 2011;26(10):2341-57. Epub 2011/06/28. doi: 10.1002/jbmr.463.
9. Karamali M, Beihaghi E, Mohammadi AA, Asemi Z. Effects of High-Dose Vitamin D Supplementation on Metabolic Status and Pregnancy Outcomes in Pregnant Women at Risk for Pre-Eclampsia. *Hormone and metabolic research = Hormon- und Stoffwechselforschung = Hormones et metabolisme*. 2015;47(12):867-72. Epub 2015/05/06. doi: 10.1055/s-0035-1548835.
10. Khan F, Ahmad T, Hussain R, Bhutta Z. A Randomized Controlled Trial of Oral Vitamin D Supplementation in Pregnancy to Improve Maternal Periodontal Health and Birth Weight. *Journal of International Oral Health*. 2016;8(6):657-65. doi: 10.2047/jioh-08-06-03.
11. Litonjua AA, Carey VJ, Laranjo N, Harshfield BJ, McElrath TF, O'Connor GT, et al. Effect of Prenatal Supplementation With Vitamin D on Asthma or Recurrent Wheezing in Offspring by Age 3 Years: The VDAART Randomized Clinical Trial. *Jama*. 2016;315(4):362-70. Epub 2016/01/28. doi: 10.1001/jama.2015.18589.
12. Mallet E, Gugi B, Brunelle P, Henocq A, Basuyau JP, Lemeur H. Vitamin D supplementation in pregnancy: a controlled trial of two methods. *Obstet Gynecol*. 1986;68(3):300-4. Epub 1986/09/01.
13. Mojibian M, Soheilykhah S, Fallah Zadeh MA, Jannati Moghadam M. The effects of vitamin D supplementation on maternal and neonatal outcome: A randomized clinical trial. *Iranian Journal of Reproductive Medicine*. 2015;13(11):687-96.
14. Yesiltepe Mutlu G, Ozsu E, Kalaca S, Yuksel A, Pehlevan Y, Cizmecioglu F, et al. Evaluation of Vitamin D Supplementation Doses during Pregnancy in a Population at High Risk for Deficiency. *Hormone Research in Paediatrics*. 2014;81(6):402-8.
15. Roth DE, Al Mahmud A, Raqib R, Akhtar E, Perumal N, Pezzack B, et al. Randomized placebo-controlled trial of high-dose prenatal third-trimester vitamin D3 supplementation in Bangladesh: the AVIDD trial. *Nutrition Journal*. 2013;12:47-. doi: 10.1186/1475-2891-12-47.
16. Sabet Z, Ghazi A, Tohidi M, Oladi B. VITAMIN D SUPPLEMENTATION IN PREGNANT IRANIAN WOMEN: EFFECTS ON MATERNAL AND NEONATAL VITAMIN D AND PARATHYROID HORMONE STATUS. *Acta Endocrinologica (1841-0987)*. 2012;8(1).

17. Sablok A, Batra A, Thariani K, Batra A, Bharti R, Aggarwal AR, et al. Supplementation of vitamin D in pregnancy and its correlation with fetomaternal outcome. *Clinical endocrinology*. 2015;83(4):536-41. Epub 2015/02/17. doi: 10.1111/cen.12751.
18. Sahoo SK, Katam KK, Das V, Agarwal A, Bhatia V. Maternal vitamin D supplementation in pregnancy and offspring outcomes: a double-blind randomized placebo-controlled trial. *Journal of bone and mineral metabolism*. 2017;35(4):464-71. Epub 2016/09/16. doi: 10.1007/s00774-016-0777-4.
19. Thiele DK, Ralph J, El-Masri M, Anderson CM. Vitamin D3 Supplementation During Pregnancy and Lactation Improves Vitamin D Status of the Mother-Infant Dyad. *Journal of obstetric, gynecologic, and neonatal nursing : JOGNN*. 2017;46(1):135-47. Epub 2016/11/15. doi: 10.1016/j.jogn.2016.02.016.
20. Yap C, Cheung NW, Gunton JE, Athayde N, Munns CF, Duke A, et al. Vitamin D supplementation and the effects on glucose metabolism during pregnancy: a randomized controlled trial. *Diabetes care*. 2014;37(7):1837-44. Epub 2014/04/25. doi: 10.2337/dc14-0155.
21. Valizadeh M, Piri Z, Mohammadian F, Kamali K, Amir Moghadami HR. The Impact of Vitamin D Supplementation on Post-Partum Glucose Tolerance and Insulin Resistance in Gestational Diabetes: A Randomized Controlled Trial. *International Journal of Endocrinology and Metabolism*. 2016;14(2):e34312. doi: 10.5812/ijem.34312.
22. Vaziri F, Nasiri S, Tavana Z, Dabbaghmanesh MH, Sharif F, Jafari P. A randomized controlled trial of vitamin D supplementation on perinatal depression: in Iranian pregnant mothers. *BMC Pregnancy and Childbirth*. 2016;16:239. doi: 10.1186/s12884-016-1024-7.
23. Yu CK, Sykes L, Sethi M, Teoh TG, Robinson S. Vitamin D deficiency and supplementation during pregnancy. *Clinical endocrinology*. 2009;70(5):685-90. Epub 2008/09/06. doi: 10.1111/j.1365-2265.2008.03403.x.
24. Zerofsky M, Jacoby B, Stephensen C. A randomized controlled trial of vitamin D supplementation in pregnancy: effects on vitamin D status and clinical outcomes (1041.5). *The FASEB Journal*. 2014;28(1\_supplement):1041.5. doi: 10.1096/fasebj.28.1\_supplement.1041.5.
