# Supplementary material for: Association of maternal circulating 25(OH)D and calcium with birth weight: A mendelian randomisation analysis
Source: PubMed Central journal article supplement (PMC6581250; doi:10.1371/journal.pmed.1002828), 2019-06-18
Supplement: pmed.1002828.s015.pdf [file pmed.1002828.s015.pdf]

**S9 Table: Risk of Bias in studies included in IV of RCT analyses of Calcium supplementation**

| Study                   | Number randomised | Loss to follow-up (%)    | Placebo control | Intention to treat analysis | Risk of Bias* |         |      |      |         |         |       |
|-------------------------|-------------------|--------------------------|-----------------|-----------------------------|---------------|---------|------|------|---------|---------|-------|
|                         |                   |                          |                 |                             | RSG           | AC      | BP   | BO   | IOD     | SR      | Other |
| Bogges 1997[1]          | 23                | 22%                      | Yes             | No                          | low           | low     | low  | low  | unclear | low     | low   |
| Belizan 1983[2]         | 36                | Unclear '0 missing data' | Yes             | Yes                         | unclear       | unclear | low  | low  | low     | low     | low   |
| Chan 2006[3]**          | 72                | 8%                       | No              | No                          | low           | low     | high | high | low     | unclear | low   |
| Lopez-Jaramillo 1989[4] | 106               | 13%                      | Yes             | Yes                         | low           | low     | low  | low  | unclear | unclear | low   |
| Lopez-Jaramillo 1997[5] | 274               | 5%                       | Yes             | No                          | low           | low     | low  | low  | low     | low     | low   |
| Wanchu 2001[6]          | 120               | 17%                      | No              | No                          | unclear       | unclear | high | high | high    | unclear | low   |

\* Each of the seven categories were categorised by reviewers as low, medium, or high risk of bias or unclear. RSG: Random Sequence Generation; AC: Allocation Concealment; BP: Blinding of personnel/participants (performance bias); BO: Blinding of outcome assessment (detection bias); IOD: Incomplete outcome data (attrition bias); SR: Selective Reporting; Other: other sources of bias

\*\* Chan participants were randomised to control or one of two intervention groups: orange juice with calcium fortification or increased dairy intake (only the comparison of orange just with calcium fortification to control group was used here); the other three studies compared calcium supplementation tablets to placebo or no supplementation (control groups)

## **References**

1. Boggess KA, Samuel L, Schmucker BC, Waters J, Easterling TR. A randomized controlled trial of the effect of third-trimester calcium supplementation on maternal hemodynamic function. *Obstetrics & Gynecology*. 1997;90(2):157-61. doi: [https://doi.org/10.1016/S0029-7844\(97\)00248-2](https://doi.org/10.1016/S0029-7844(97)00248-2).
2. Belizan JM, Villar J, Zalazar A, Rojas L, Chan D, Bryce GF. Preliminary evidence of the effect of calcium supplementation on blood pressure in normal pregnant women. *American journal of obstetrics and gynecology*. 1983;146(2):175-80. Epub 1983/05/15.
3. Chan GM, McElligott K, McNaught T, Gill G. Effects of dietary calcium intervention on adolescent mothers and newborns: A randomized controlled trial. *Obstet Gynecol*. 2006;108(3 Pt 1):565-71. Epub 2006/09/02. doi: 10.1097/01.AOG.0000231721.42823.9e.
4. P. LJ, M. N, M. WR, R. Y. Calcium supplementation reduces the risk of pregnancy-induced hypertension in an Andes population. *BJOG: An International Journal of Obstetrics & Gynaecology*. 1989;96(6):648-55. doi: doi:10.1111/j.1471-0528.1989.tb03278.x.
5. Lopez-Jaramillo P, Delgado F, Jacome P, Teran E, Ruano C, Rivera J. Calcium supplementation and the risk of preeclampsia in Ecuadorian pregnant teenagers. *Obstet Gynecol*. 1997;90(2):162-7. Epub 1997/08/01. doi: 10.1016/s0029-7844(97)00254-8.
6. Wanchu M, Malhotra S, Khullar M. Calcium supplementation in pre-eclampsia. *The Journal of the Association of Physicians of India*. 2001;49:795-8. Epub 2002/02/12.
