# Supplementary material for: Association of maternal circulating 25(OH)D and calcium with birth weight: A mendelian randomisation analysis
Source: PubMed Central journal article supplement (PMC6581250; doi:10.1371/journal.pmed.1002828), 2019-06-18
Supplement: pmed.1002828.s016.pdf [file pmed.1002828.s016.pdf]

**S10 Table: Associations between weighted-allele-scores and potential confounders**

|                                                               | Study                                   | Difference in mean or odds ratio (95% CI) per unit increase in weighted allele score (WAS) |                          |
|---------------------------------------------------------------|-----------------------------------------|--------------------------------------------------------------------------------------------|--------------------------|
|                                                               |                                         | 25(OH)D                                                                                    | Calcium                  |
| Maternal BMI (kg/m <sup>2</sup> )*                            | UK Biobank (N = 243,797) <sup>c,e</sup> | 0.001 (-0.007 to 0.009)                                                                    | 0.001 (-0.002 to 0.005)  |
|                                                               | ALSPAC (N =6,544)                       | -0.020 (-0.073 to 0.034)                                                                   | -0.008 (-0.030 to 0.014) |
|                                                               | EFSOCH (N =844)                         | 0.102 (-0.042 to 0.247)                                                                    | 0.031 (-0.030 to 0.092)  |
| Maternal Height (m)*                                          | UK Biobank (N = 244,363) <sup>d,e</sup> | -0.010 (-0.017 to -0.003)                                                                  | -0.002 (-0.005 to 0.001) |
|                                                               | ALSPAC (N =6,862)                       | 0.020 (-0.032 to 0.073)                                                                    | -0.004 (-0.026 to 0.018) |
|                                                               | EFSOCH (N =930)                         | 0.163 (0.024 to 0.302)                                                                     | 0.026 (-0.032 to 0.084)  |
| Maternal Systolic Blood Pressure (mmHg)*                      | UK Biobank (N = 244,183) <sup>e</sup>   | -0.002 (-0.009 to 0.006)                                                                   | -0.001 (-0.004 to 0.002) |
|                                                               | ALSPAC (N =1,451)                       | -0.033 (-0.150 to 0.084)                                                                   | -0.033 (-0.080 to 0.014) |
|                                                               | EFSOCH (N =NA)                          | NA                                                                                         | NA                       |
| Maternal Townsend area deprivation* <sup>a</sup>              | UK Biobank (N = 244,564)                | 0.002 (-0.006 to 0.010)                                                                    | 0.004 (0.000 to 0.007)   |
|                                                               | ALSPAC (N =NA)                          | NA                                                                                         | NA                       |
|                                                               | EFSOCH (N =933)                         | -0.196 (-0.336 to -0.055)                                                                  | -0.016 (-0.075 to 0.043) |
| Education (odds ratio of university degree yes or no)         | UK Biobank (N = 238,261) <sup>e</sup>   | 0.997 (0.979 to 1.014)                                                                     | 0.987 (0.980 to 0.995)   |
|                                                               | ALSPAC (N =6,956)                       | 1.032 (0.876 to 1.188)                                                                     | 0.955 (0.897 to 1.012)   |
|                                                               | EFSOCH (N =NA)                          | NA                                                                                         | NA                       |
| Maternal smoking (odds ratio of current smoker vs non-smoker) | UK Biobank (N = 160,043) <sup>e</sup>   | 0.983 (0.951 to 1.015)                                                                     | 1.008 (0.994 to 1.022)   |
|                                                               | ALSPAC (N =7,237)                       | 0.990 (0.859 to 1.122)                                                                     | 1.007 (0.950 to 1.065)   |
|                                                               | EFSOCH (N =928)                         | 1.233 (0.549 to 1.917)                                                                     | 1.001 (0.831 to 1.172)   |
| Western Diet <sup>b</sup>                                     | UK Biobank (N = 355,829) <sup>e</sup>   | -0.001 (-0.008 to 0.006)                                                                   | 0.001 (-0.002 to 0.004)  |
|                                                               | ALSPAC (N =NA)                          | NA                                                                                         | NA                       |
|                                                               | EFSOCH (N =NA)                          | NA                                                                                         | NA                       |

\*The values given are z-scores/single inverse normalized. a) A score that takes values from the census of an area (namely percentage of households without a motor vehicle, percentage of households with more than one person per room, percentage of households not owner-occupied and percentage of residents who are unemployed), converts them to z-scores, then adds the values up, with a greater value meaning

greater deprivation. b) Western Diet is a principal component of variation in reported diet in UK Biobank. c) The UK Biobank female BMI variable excluded those with a BMI <15 and those that were pregnant, the variable then being adjusted for age, assessment centre and five principal components, with the residuals being extracted and inverse-normalized. d) The UK Biobank female Height variable was adjusted for age, assessment centre and five principal components, with the residuals being extracted and inverse-normalized. e) All UK Biobank variables were adjusted for five principal components
