# Supplementary material for: Association of maternal circulating 25(OH)D and calcium with birth weight: A mendelian randomisation analysis
Source: PubMed Central journal article supplement (PMC6581250; doi:10.1371/journal.pmed.1002828), 2019-06-18

**S1 Fig: Flow diagram of participant inclusion for ALSPAC and EFSOCH**

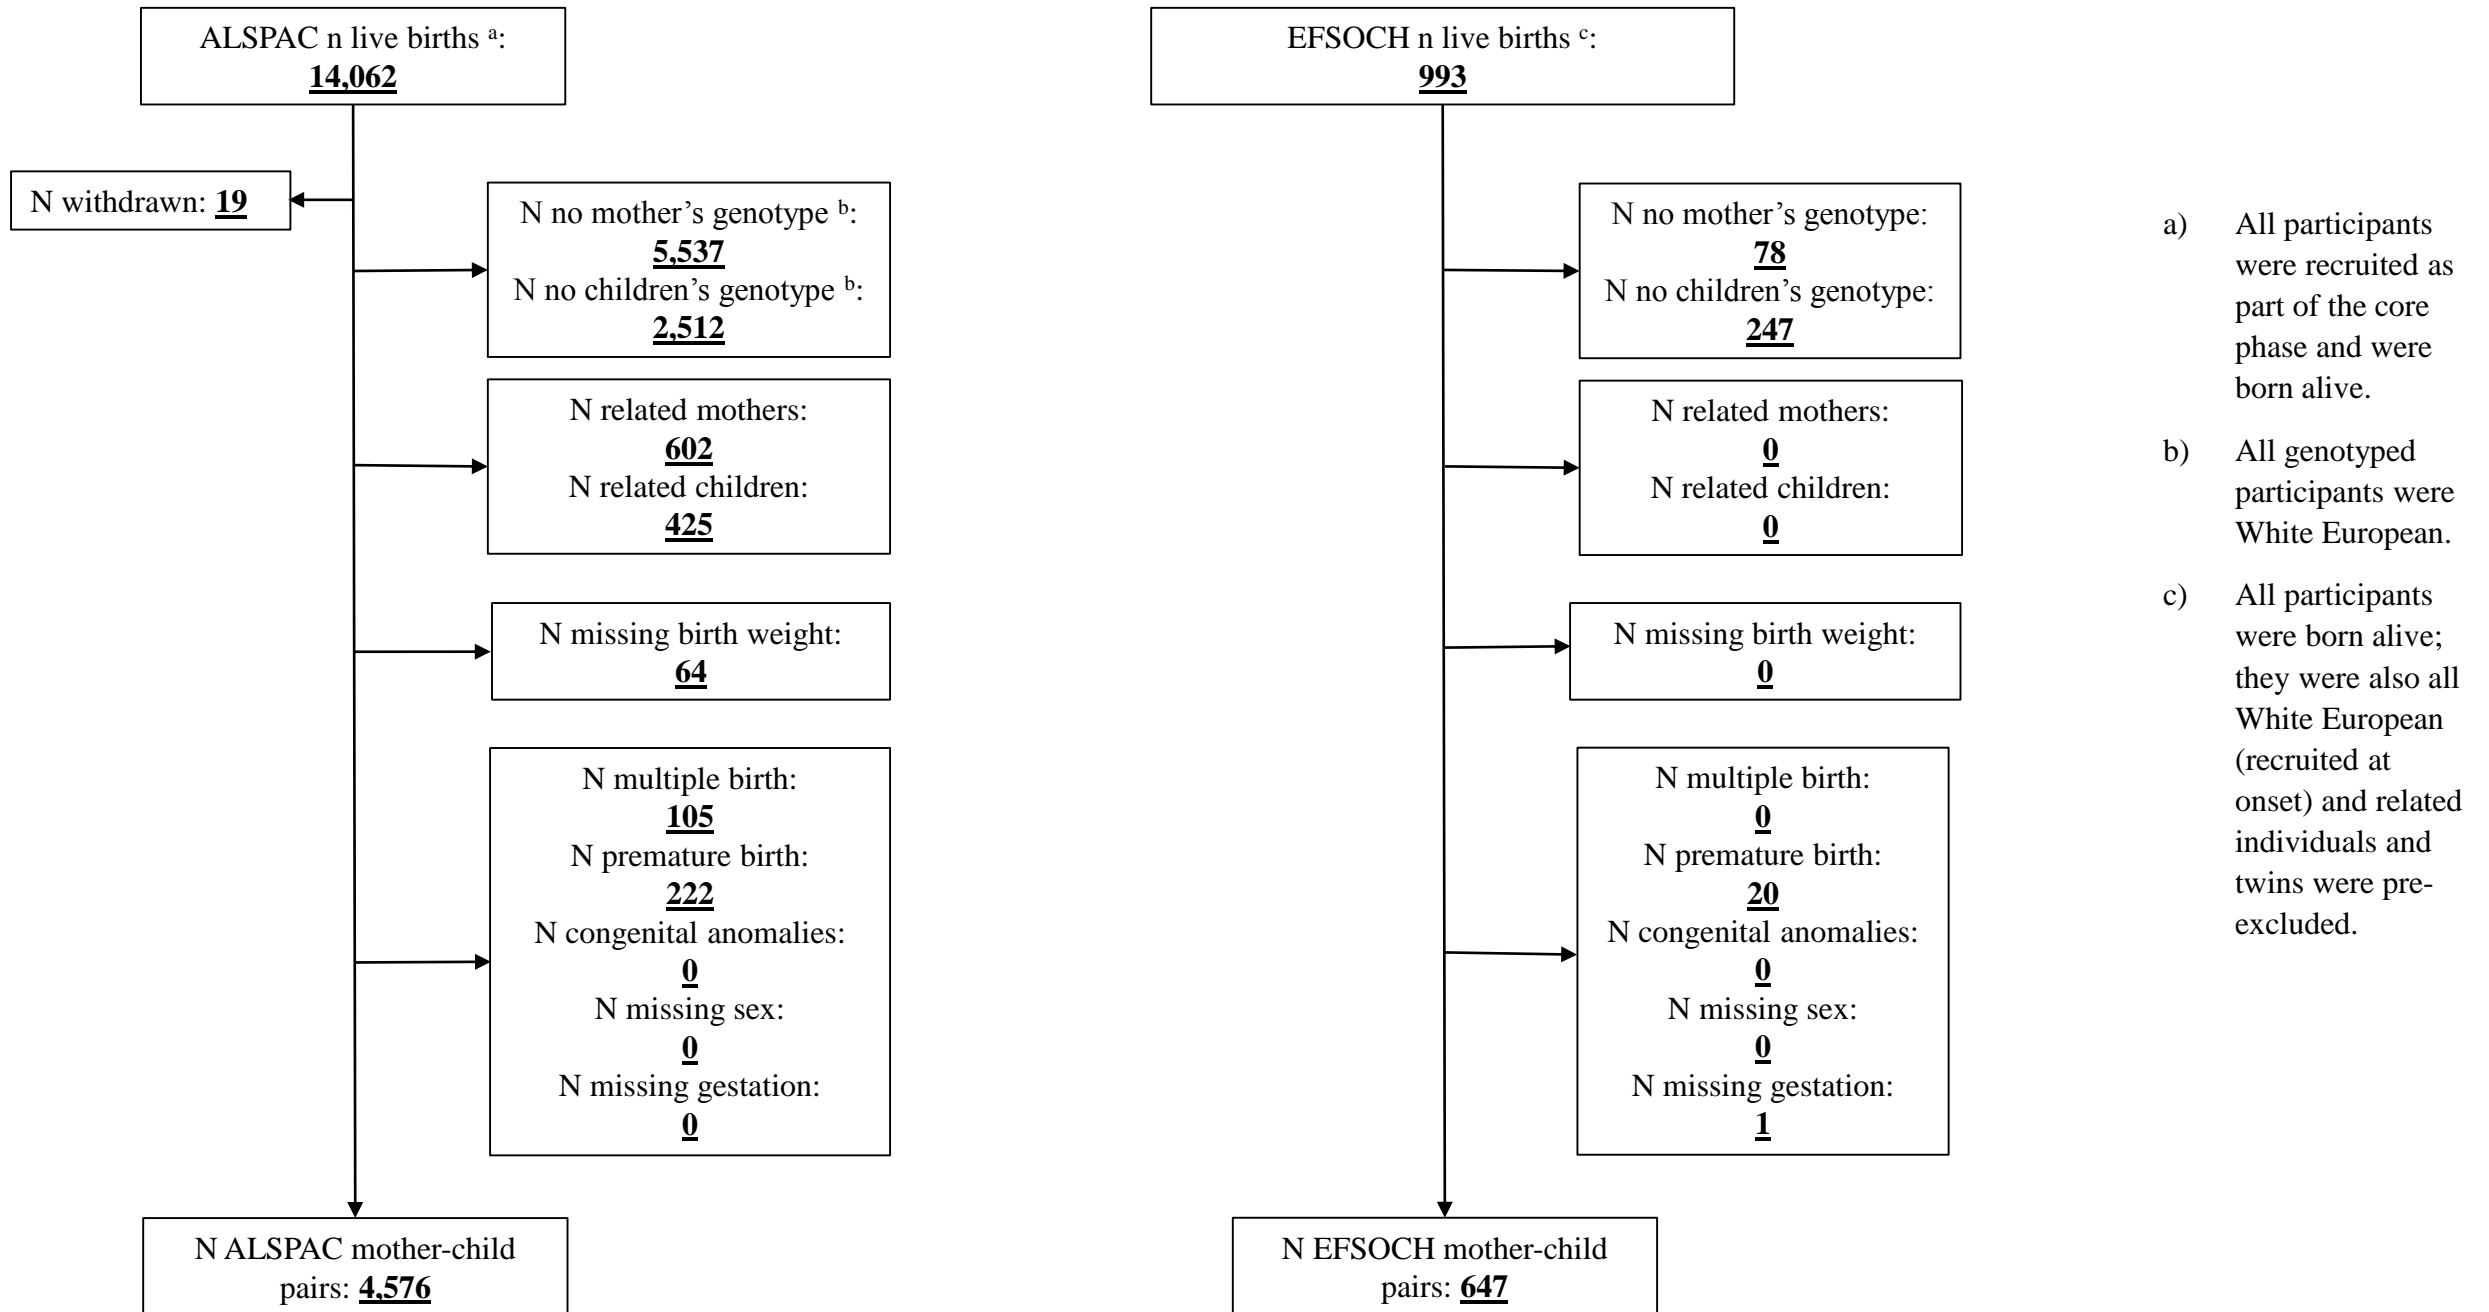

Supplement: pmed.1002828.s018.pdf [file pmed.1002828.s018.pdf]
