# Supplementary material for: Association of maternal circulating 25(OH)D and calcium with birth weight: A mendelian randomisation analysis
Source: PubMed Central journal article supplement (PMC6581250; doi:10.1371/journal.pmed.1002828), 2019-06-18
Supplement: pmed.1002828.s020.pdf [file pmed.1002828.s020.pdf]

**S3 Fig: Flow diagram for inclusion of trials in the instrumental variables applied to RCTs**

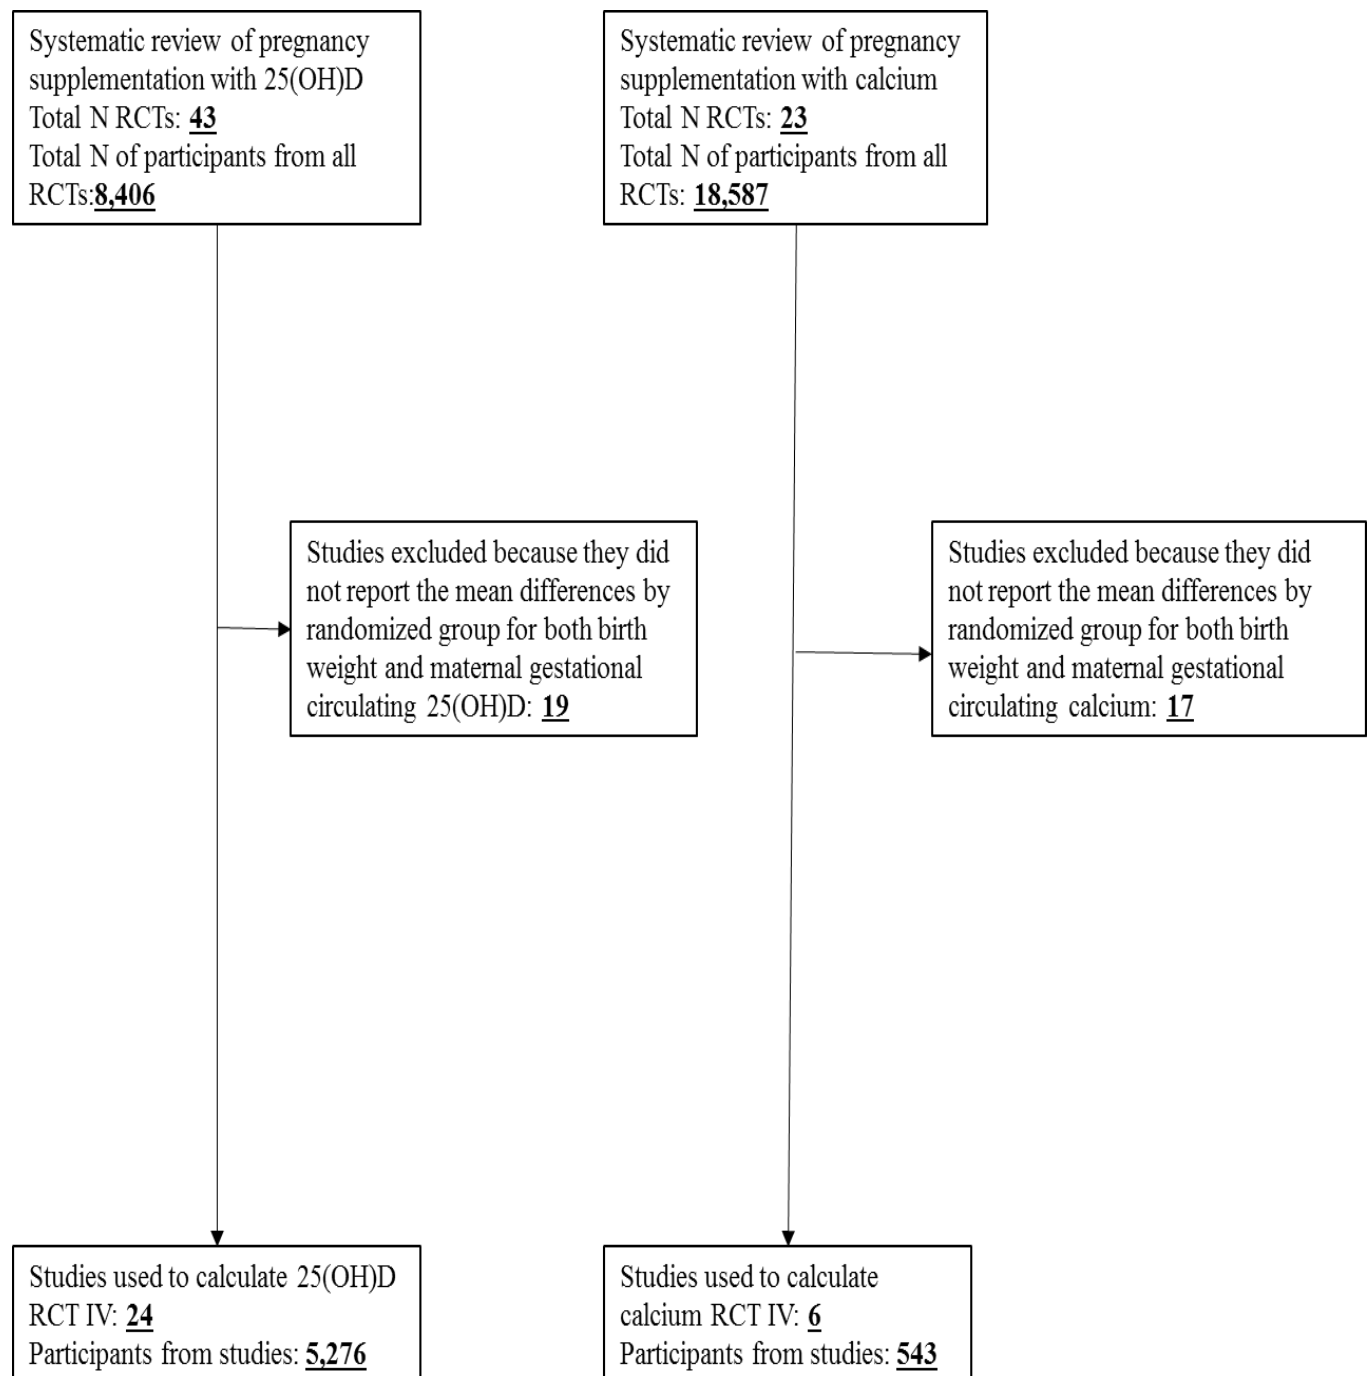

Studies for 25(OH)D were taken from Roth et al 2017[1] and studies for calcium were taken from Buppasiri et al 2015[2].

**References**

1. Roth DE, Leung M, Mesfin E, Qamar H, Watterworth J, Papp E. Vitamin D supplementation during pregnancy: state of the evidence from a systematic review of randomised trials. *BMJ*. 2017;359

2. Buppasiri P, Lumbiganon P, Thinkhamrop J, Ngamjarus C, Laopaiboon M, Medley N. Calcium supplementation (other than for preventing or treating hypertension) for improving pregnancy and infant outcomes. *Cochrane Database of Systematic Reviews*. 2015;(2). doi: 10.1002/14651858.CD007079.pub3.
