# Supplementary material for: Association of maternal circulating 25(OH)D and calcium with birth weight: A mendelian randomisation analysis
Source: PubMed Central journal article supplement (PMC6581250; doi:10.1371/journal.pmed.1002828), 2019-06-18
Supplement: pmed.1002828.s022.pdf [file pmed.1002828.s022.pdf]

**S5 Fig: Leave-One-Out Analysis for effect of 25(OH)D on birth weight RCT instrumental variable Wald ratio estimate**

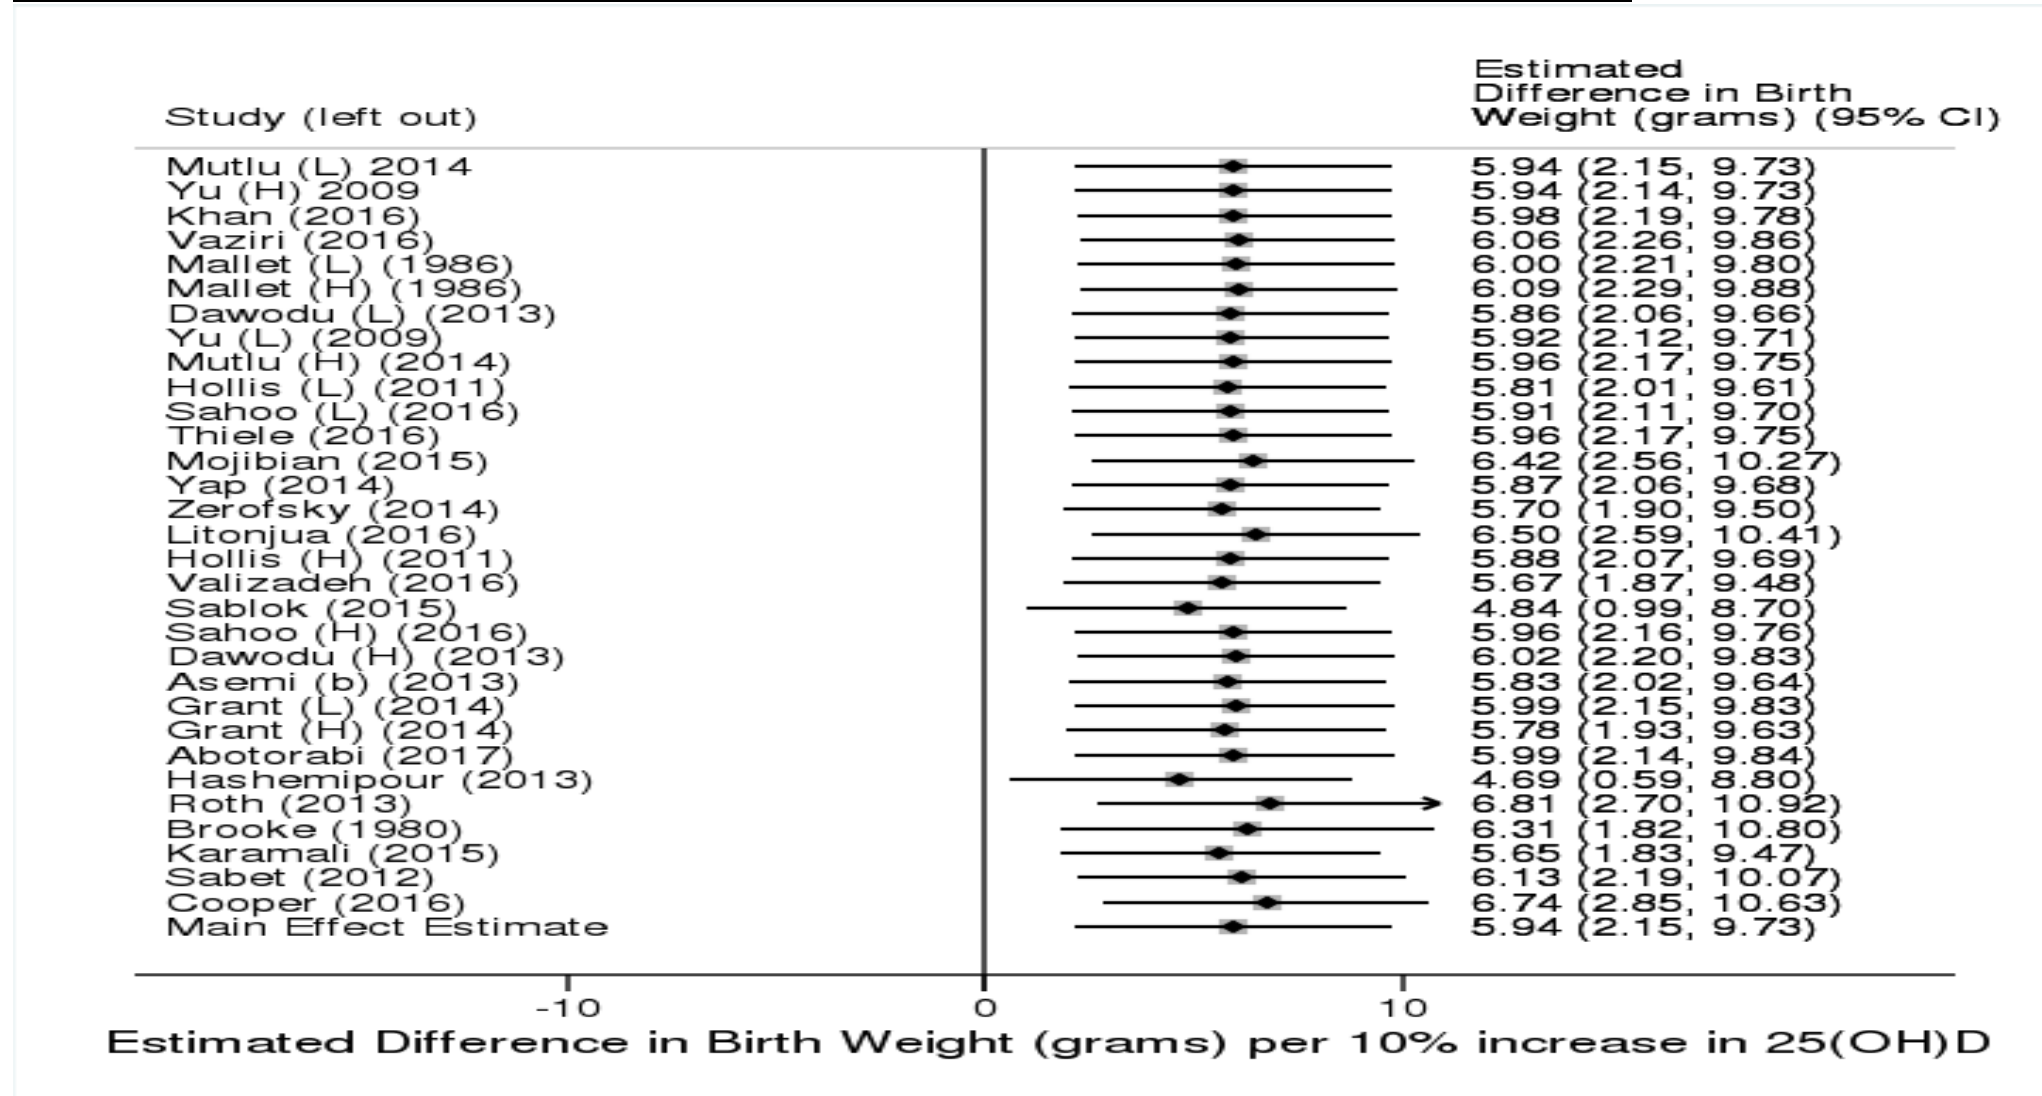

Studies were taken from Roth et al 2017[1].

## **References**

1. Roth DE, Leung M, Mesfin E, Qamar H, Watterworth J, Papp E. Vitamin D supplementation during pregnancy: state of the evidence from a systematic review of randomised trials. *BMJ*. 2017;359.
